# Supplementary material
Source: PubMed Central journal article supplement (PMC9171573)
Supplement: aqab212_suppl_supplementary_tables.pdf [file aqab212_suppl_supplementary_tables.pdf]

## SUPPLEMENTAL TABLES

| Plate        | Primer Name         | PCR Conditions                                                                                                                                  | Primer Sequence                                                                                                                        | Citation/Source              |
|--------------|---------------------|-------------------------------------------------------------------------------------------------------------------------------------------------|----------------------------------------------------------------------------------------------------------------------------------------|------------------------------|
| First plate  | ORF1ab              | Per Manufacturer's instruction                                                                                                                  |                                                                                                                                        | Taqpath COVID-19 Combo assay |
|              | N gene              | Per Manufacturer's instruction                                                                                                                  |                                                                                                                                        | Taqpath COVID-19 Combo assay |
|              | S gene              | Per Manufacturer's instruction                                                                                                                  |                                                                                                                                        | Taqpath COVID-19 Combo assay |
| Second Plate | ORF1del: Δ3675-3677 | 360 nM of each primer<br>80 nM of each probe<br>25°C 2 min x1<br>52°C 15 min x1<br>94°C 2 min x1<br>(94°C 15 sec, 57°C 40 sec, 68°C 20 sec) x45 | Forward: TGCCTGCTAGTTGGGTGATG<br>Reverse: TGCTGTCATAAGGATTAGTAACACT<br>Probe: 5CY5--GTTTGTCTG /TAO/<br>GTTTTAAGCTAAAAGACTGTG--3IAbrQSp | [8]                          |
|              | S protein: N501Y    | 360 nM of each primer<br>80 nM of each probe<br>25°C 2 min x1<br>52°C 15 min x1<br>94°C 2 min x1<br>(94°C 15 sec, 57°C 40 sec, 68°C 20 sec) x45 | Forward: CTGAAATCTATCAGGCCGGTA<br>Reverse: GAAAGTACTACTACTCTGTATGG<br>Probe: 56-FAM--TTTCCAACCCACTTATGGT--3BHQ_1                       | [9]                          |
|              | S protein: E484K    | 400 nM of each primer<br>50°C 10 min x1<br>95°C 1 min x1<br>(95°C 2 min, 55°C 15 sec) x40                                                       | Forward: ACACCTTGTAATGGTGTTA<br>Reverse: CTGGTGCATGTAGAAGTTCA<br>Probe: SYBR Green                                                     | This manuscript              |
|              | S protein: L452R    | 360 nM of each primer<br>80 nM of each probe<br>25°C 2 min x1<br>52°C 15 min x1<br>94°C 2 min x1<br>(94°C 15 sec, 57°C 40 sec, 68°C 20 sec) x45 | Forward: CTCTCTCAAAGGTTTGAGATTAGACT<br>Reverse: CTTGATTCTAAGTTGGTGTTAA<br>Probe: HEX--CCTAAACAATCTATACCGGTAATT--3BHQ_1                 | [9]                          |

| Strain                  | Strain Type | # of GISAID sequences | ORF1del(%) | S:N501Y (%) | S: E484K (%) | S: L452R (%) |
|-------------------------|-------------|-----------------------|------------|-------------|--------------|--------------|
| Alpha (B.1.1.7)         | VoC         | 115403                | 96.5       | 97.8        | 0.8          | 0.1          |
| Beta (B.1.351)          | VoC         | 2988                  | 90.9       | 87.6        | 87.2         | 0.3          |
| Gamma (P.1)             | VoC         | 18685                 | 97.6       | 95.3        | 94.9         | 0.0          |
| Delta (B.1.617.2, AY.3) | VoC         | 418169                | 0.1        | 0.1         | 0.0          | 98.0         |
| Eta (B.1.525)           | Vol         | 560                   | 95.4       | 0.4         | 97.3         | 0.0          |
| Ito (B.1.526)           | Vol         | 1949                  | 96.9       | 0.1         | 78.0         | 0.0          |

**Supplemental Table 3: Example ruleset for calling of Variants on qPCR-based Screen**

| <b>ORF1ab</b> | <b>N gene</b> | <b>S gene</b>                        | <b>ORF1 del:<br/>Δ3675-3677</b> | <b>S: N501Y</b> | <b>S: E484K</b>                 | <b>S: L452</b> | <b><u>Interpretation</u></b>     |
|---------------|---------------|--------------------------------------|---------------------------------|-----------------|---------------------------------|----------------|----------------------------------|
| CT< 40        | CT<40         | (S gene CT) –<br>(N gene CT) =<<br>6 | CT<40                           | CT<40           | (E484K CT) – (N<br>gene CT) =<5 | CT<40          |                                  |
| TRUE          | TRUE          | FALSE                                | FALSE                           | TRUE            | FALSE                           | FALSE          | <b>Alpha (B.1.1.7)</b>           |
| TRUE          | TRUE          | FALSE                                | FALSE                           | TRUE            | TRUE                            | FALSE          | <b>Alpha<br/>(B.1.1.7+E484K)</b> |
| TRUE          | TRUE          | TRUE                                 | FALSE                           | TRUE            | TRUE                            | FALSE          | <b>Gamma or Beta</b>             |
| TRUE          | TRUE          | TRUE                                 | TRUE                            | FALSE           | FALSE                           | TRUE           | <b>Delta</b>                     |
| TRUE          | TRUE          | FALSE                                | FALSE                           | FALSE           | TRUE                            | FALSE          | <b>Eta</b>                       |
| TRUE          | TRUE          | TRUE                                 | FALSE                           | FALSE           | TRUE                            | FALSE          | <b>Iota</b>                      |
| TRUE          | TRUE          | TRUE                                 | FALSE                           | FALSE           | FALSE                           | TRUE           | <b>B.1.526.1</b>                 |
| TRUE          | TRUE          | TRUE                                 | FALSE                           | FALSE           | FALSE                           | FALSE          | <b>B.1.526.2</b>                 |
| TRUE          | TRUE          | TRUE                                 | TRUE                            | TRUE            | TRUE                            | FALSE          | <b>B.1.621</b>                   |
| TRUE          | TRUE          | TRUE                                 | TRUE                            | FALSE           | TRUE                            | FALSE          | <b>P.2</b>                       |

## SUPPLEMENTAL FIGURES

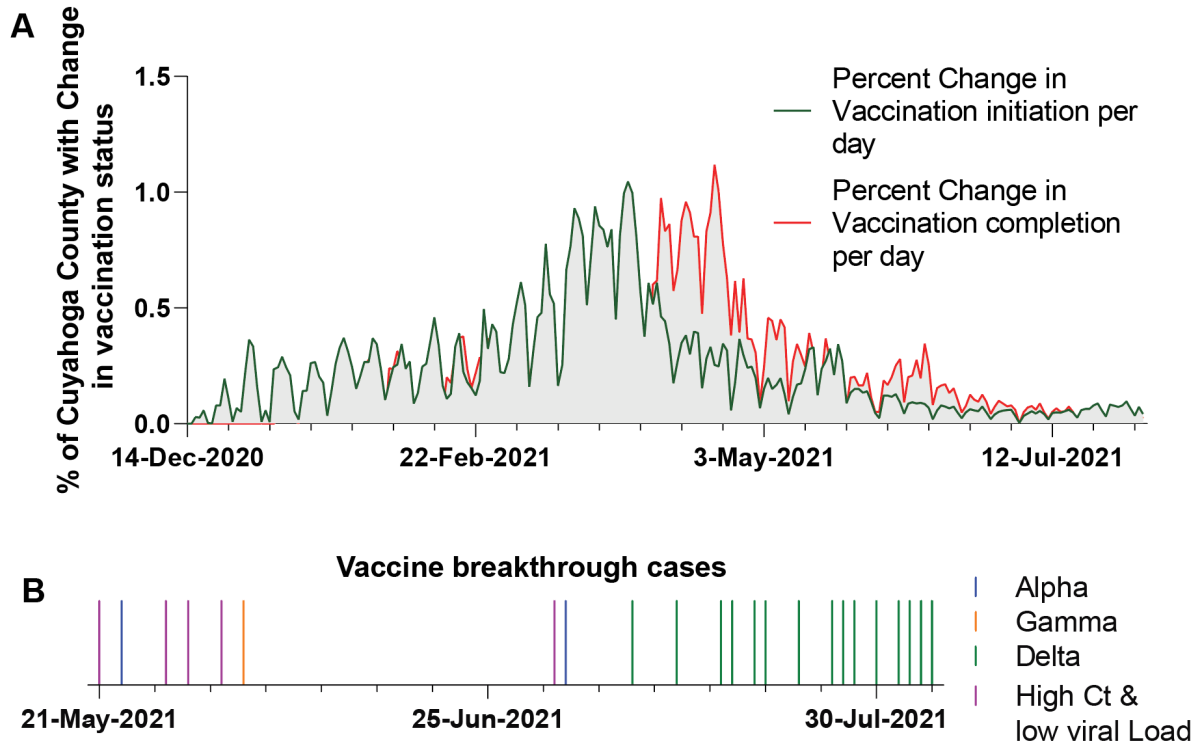

**Supplemental Figure 1:** A) Cuyahoga County vaccination initiation and completion rates as a percentage of the population. B) Incidence of positive SARS-CoV-2 tests over time per variant. Each line indicates one positive result. Colors indicate the variant identified or high Ct, respectively.

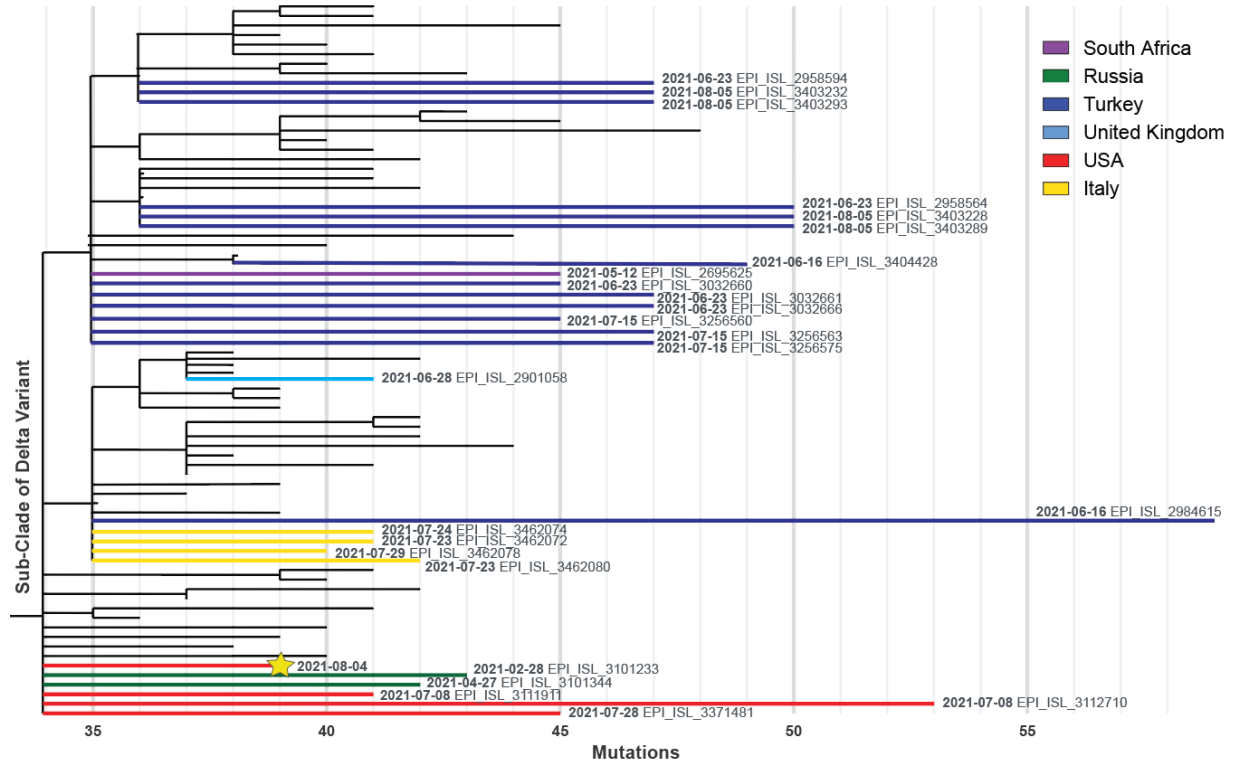

**Supplemental Figure 2:** Subset of Nextclade phylogenetic tree containing the Delta+E484K sample (indicated with star) and most closely related Delta+E484K samples. Delta variant reference samples are shown in black lines. For Delta+E484K samples, country of origin labeled with colors per legend, date sample was collected in bold, and Accession ID's indicated.

## REFERENCES (as per main text)

- Vogels, C.B.F., et al., Multiplex qPCR discriminates variants of concern to enhance global surveillance of SARS-CoV-2. *PLoS Biol*, 2021. 19(5): p. e3001236.
- Wang, H., et al., Multiplex SARS-CoV-2 Genotyping Reverse Transcriptase PCR for Population-Level Variant Screening and Epidemiologic Surveillance. *J Clin Microbiol*, 2021. 59(8): p. e0085921.
